# Supplementary material for: The Salt Sensitivity Induced by Disruption of Cell Wall-Associated Kinase 1 (SlWAK1) Tomato Gene Is Linked to Altered Osmotic and Metabolic Homeostasis
Source: PubMed Central journal article supplement (PMC7503591; doi:10.3390/ijms21176308), 2020-08-31
Supplement: ijms-21-06308-s001.pdf [file ijms-21-06308-s001.pdf]

Solyc09g014740. 1 -MQLKQIALFF-SFTCSV-----TILTSISA-----HPTADSPVSPFTITKAPNTAKPGCPKQCGNVTIPY  
Solyc09g014730. 1 MMKQCQLLLH--FLLIFLTLANA-----QTNTTITKGANITKPGCPKKCGNITIPY  
Solyc09g014720. 1 -MQHYQVALFSFQLPCEMLILLTLATAQIIPSNTPPTNSSTPTNATAPAPSPFTNTITKAANITKPGCPKQCGNVTIPY  
Solyc09g014710. 1 -MQLRQIPF---FISFMLILLTLDTAQIIPSNTPPTNTTSE-----PIITAAITITKAVIITKPGCPKKGNLTVPY  
consensus 1 .....\*.....\*.....\*

Solyc09g014740. 61 PFGI--GSDCAMDSSFEINCTAGS--SATLYRSNIKIIDISDSEIRVSNMLYQRCYSETGQLLVDPNPTWLRFKLTPYS  
Solyc09g014730. 53 PFGIGLGCFAFDSSFEIICGNKST-GTPTLYASNIKIVYDISDAETRVFNFTAETCYTSAGVKL-VEYPLWVTLGRSTPYS  
Solyc09g014720. 80 PFGI--GSGCALDPMFEIDCNV-----TTPFIGNIQIYDISDAEMRISNFINTKCYSQTGVLI-QDIPSWITLGTKSPYT  
Solyc09g014710. 71 PFGIGLGSICALDPMFEINCDTDTIDSPTPFIGNIRVYDISDAEMRVSTNINQRCYSSTGRLL-RNDPSWMNLGTSSPYS  
consensus 81 \*\*\*\*\*

Solyc09g014740. 137 FSALNMFVVGCDETAIMRGDNFRNGCYAFCTNSSGVNVVVEGRCMGTGCCQIEIPKGLKYFNNTMDS-VENHTGLWSFNR  
Solyc09g014730. 131 FSTLNRFTVVGCDSDSAIISSTKFIINGCPTTCTSSS--HVVDGSCMASGCCQIIPKGLKNFNTSMQS-SRNHSRIWDFNF  
Solyc09g014720. 152 FSTLNRFTVVGCDGATVSGNNFANGCPSTCTSTN--DIVKGCMTGFCQIITIPKGLKFNNTMVT-TRNHSLLWSFNP  
Solyc09g014710. 150 FSTLNRFTVVGCDVAIIFGGGFANGCPAICNTS--QVTEGSCMTGTCQIITIPKGLRIFNNTMQS-SPQNHGTWVSNP  
consensus 161 \*\*\*\*\*

Solyc09g014740. 216 CGYAFLEGEASRFQFRGEHDLTDNDLNRILDHVPIVLDWAIGNNLTGDAQKRDPDYACLVNSHCVDSDTGLGGYRCHCDQ  
Solyc09g014730. 208 CGYAFLEGEASRFQFRGMEDLNDLNFVEKIVNVPIVLDWAIGN-LTCVEAKKRNDFYCRVNSQCVDSDTGLGGYRRCNPF  
Solyc09g014720. 229 CGHSFLEGEASRFQFQIEDLSDVNFANKIRNVPIVLDWAIGN-LSCVEARKSNDYACLNNSQVDSDTSLGGYRCSNCS  
Solyc09g014710. 228 CGYSFLEGEASRFQFQGLDLDLDFNFKRILDNVPIVLDWAIGT-LSCVEARKSNDYACLNNSQVDSDTGLGGYRCAQNF  
consensus 241 \*\*\*\*\*

Solyc09g014740. 296 GYEGNPYIRPGCSDDIDECKNASTCAHYMNCINPKGSGYKCYCPKCYTDCGENNGPVCIAT--NSEFPWIKFSVGMGVGFIS  
Solyc09g014730. 287 GYEGNPYI--GCFDDIDECKNPNTNSCEQNCINPKGSYNCSCPQGYTGDGKKNRGCNALISNSEFPWIKFSVGMGVGFMS  
Solyc09g014720. 308 GYEGNPYIRPGSCDDIDECKNPNTNSCEQNCINPKGSYNCSCPQGYTGDGRKNRGCTAPNSNSEFPWIKFSVGMGVGFMS  
Solyc09g014710. 307 GYEGNPYIRPGCSDDIDECKNPNTNLCEQICINPKGSYNCSCPQGYTGDGRKNRGCTAPNSNSEFPWIKFSVGMGVGFMS  
consensus 321 \*\*\*\*\*

Solyc09g014740. 374 LVVGTMLLYFCINRKRKLKLNREKFFQONGGILLKQQIISKKGGVEATKIFTSDELKATNNYASDRILGRGGNGIVYKGI  
Solyc09g014730. 365 LVVGTMLLYFSEFKRKLKLNREKFFQONGGILLKQRISSNEGVEATKIFTAELKATNNYASDRILGRGGNGIVYKGI  
Solyc09g014720. 388 LVVGTMLLYFSEFKRKLKLNREKFFQONGGILLKQRMSSNEGVEATKIFTAELKATNNYASDRILGRGGNGIVYKGI  
Solyc09g014710. 387 LVVGTMLLYFSEFKRKLKLNREKFFQONGGILLKQRISSNEGVEATKVFTAELKATNNYASDRILGRGGNGIVYKGI  
consensus 401 \*\*\*\*\*

Solyc09g014740. 454 LPDNRIVAIKKSIVDENQIEQFINEVLLTQVNHNRNVVRLFGCCLEAEVPLLVYEVVSNGLTYEHIHNGVAPWLSLQK  
Solyc09g014730. 445 LPDNRIVAIKKSIVDENQIEQFINEVLLTQVNHNRNVVRLFGCCLEAEVPLLVYEVVSNGLTYEHIHNGVAPWLSLEN  
Solyc09g014720. 468 LPDNRIVAIKKSIVDENQIEQFINEVLLTQVNHNRNVVRLFGCCLEAEVPLLVYEVVSHGTLYEHIHNRNGAPWLSWEN  
Solyc09g014710. 467 LPDNRIVAIKKSIVDENQIEQFINEVLLTQVNHNRNVVRLFGCCLEAEVPLLVYEVVSNGLTYEHIHNGVAPWLSWKN  
consensus 481 \*\*\*\*\*

Solyc09g014740. 534 RLRVASETANSLAYLHSSASMPPIHRDVKSANLLLDNGYTAKVADFGASRLVPLDQTRVATLVQGTGLYLDPEYFHTGQL  
Solyc09g014730. 525 RLRVASETANSLAYLHSSASMPPIHRDVKSANLLLDVYTAKVADFGASRLVPLDQTHVATLVQGTGLYLDPEYFHSQQL  
Solyc09g014720. 548 RLRVASETANSLAYLHSSASMPPIHRDVKSANLLLDVYTAKVADFGASRLVPLDQTHLATLVQGTGLYLDPEYFRTSQL  
Solyc09g014710. 547 RLRVASETANSLAYLHSSASMPPIHRDVKSANLLLDVYTAKVADFGASRLVPLDQTHLATLVQGTGLYLDPEYFRSLK  
consensus 561 \*\*\*\*\*

Solyc09g014740. 614 TDKSDVYSFGVVLAELLTGKPKISRDTISDKDKCLVEYFVSMNKNLSLFOILDRRVVREGSLEQLQKTAELIKRCLHLHG  
Solyc09g014730. 605 TEKSDVYSFGVVLAELLTGKPKILKEE-NEKDKCLIDYFILSMNTNLFQILDRRVVREGSLEQLQKTAELVKGCLSLRG  
Solyc09g014720. 628 TEKSDVYSFGVVLAELLTGKPKISKDR-NEEEKNLAEYFVLSMRKNQLFOILDRRVVREGSLEQLQKVAELVKCSLSHG  
Solyc09g014710. 627 TEKSDVYSFGVVLAELLTGKPKISRDK-NNKDKNLAEYFVLSMRKNQLFOILDRRVVREGSLEQLQKVAELVKCNCLRHG  
consensus 641 \*\*\*\*\*

Solyc09g014740. 694 EDRPTMKEVAMEIESLRKLTSS--LWSNGKEHEDEKEVELTDLYTTPIDSNIGIDNFSGQYPT-SYTNSSIFSGQYNSDSS  
Solyc09g014730. 684 EDRPTMKEVAMELESIRKFTKNNPWANGHEDE-ENEDEVLDLYTTPIDSNADNFSGQYSSYSPSL-----I  
Solyc09g014720. 707 EDRPTMKEVASELENLRKFTKNNPWANGHEE-ENEDELSDLYTTPIDSNIDNFSGQYSSNSYTNSSNFSGQYSSGST  
Solyc09g014710. 706 EHRPTMKEVAMKLESIRKFTKNNPWANGHGP-ENEDES TDLYTTPIDSNIGINKFSGQYSSNSYTNSSNFSGQYSSGSLIYTKT-  
consensus 721 \*\*\*\*\*

Solyc09g014740. 771 SLLHNTNIPR-----  
Solyc09g014730. 751 ---YHTNIPR-----  
Solyc09g014720. 786 ---SNTNIPLMKNRRAI  
Solyc09g014710. 784 -----NIPR-----  
consensus 801 .....\*

**Supplementary Figure S1.** Multiple sequence alignment of WAK proteins encoded by genes found in the cluster of the genomic region SL2.50ch09:6767500..6819500: Solyc09g014710 (SIWAK2), Solyc09g014720 (SIWAK1), Solyc09g014730 (SIWAK3) and Solyc09g014740 (SIWAK4). Conserved domains identified by making use of different bioinformatics tools (see Material and Methods) are highlighted in colours: In yellow the Ser/Thr kinase catalytic domain (STKc); in red the calcium-binding EGF-like domains (EGF-Ca); in green the cell wall-associated receptor kinase galacturonan-binding Cys-rich domain (GUB-WAKb), and in blue the transmembrane domain.

**A** 1-MQH<sup>Y</sup>QVALFS<sup>F</sup>QLP<sup>C</sup>FMLILTLATAQIIPSNTTSPPTNSTSPPTNATAPAPSPNTITKAANITKPG<sup>C</sup>PKQCGNV<sup>T</sup>VP<sup>R</sup>  
 79-Y<sup>P</sup>PF<sup>G</sup>IGSGCALDPMFEIDCNV<sup>T</sup>TPFIGNIQIYDISDAEMRISNFINTKCY<sup>S</sup>QTGVLIQDIPSWITLGT<sup>K</sup>SPY<sup>T</sup>FSTLNR<sup>R</sup>  
 157-F<sup>I</sup>VV<sup>G</sup>CD<sup>D</sup>DGAIVSGNNFANGCPSLCTSTNDIVK<sup>G</sup>KCMGFGCCQITIPKGLKFFNTTMTTRNHSLIWSFNPCGHS  
 232-FLGEASRFEFQGI<sup>E</sup>DLSDVNFANKIRNNVPIVLDWAIGNLSCVEARKSNDYA<sup>C</sup>LNNSQCV<sup>D</sup>SDTSLGGY<sup>R</sup>CS<sup>N</sup>S  
 307-GY<sup>I</sup>G<sup>N</sup>PNYIGSGCQ<sup>D</sup>DIDECADPNTNSCEKICTNIPGSYNCSCEPGY<sup>T</sup>GDGRKNGR<sup>G</sup>C<sup>I</sup>APNSNSEFPWIK<sup>F</sup>SV<sup>G</sup>M  
 381-GVGFMSLVIGTTWLY<sup>F</sup>FFIKKRKLIK<sup>L</sup>REKFFQ-413

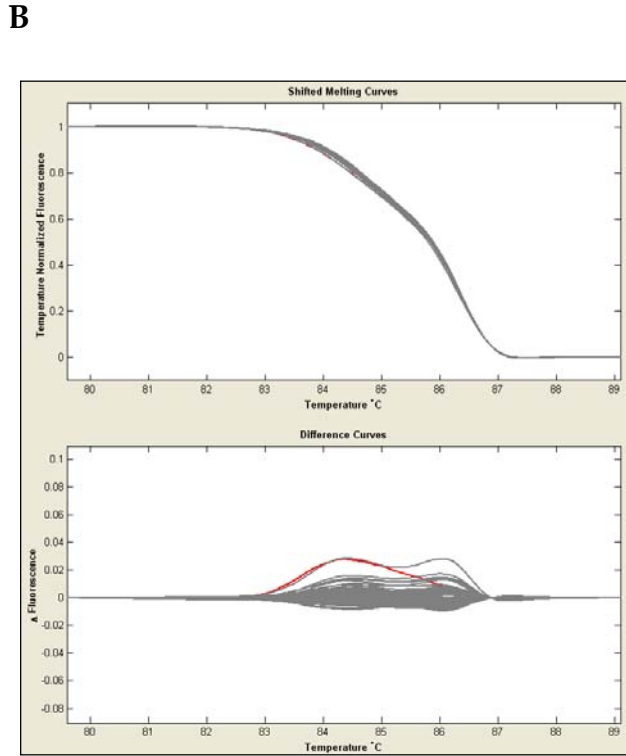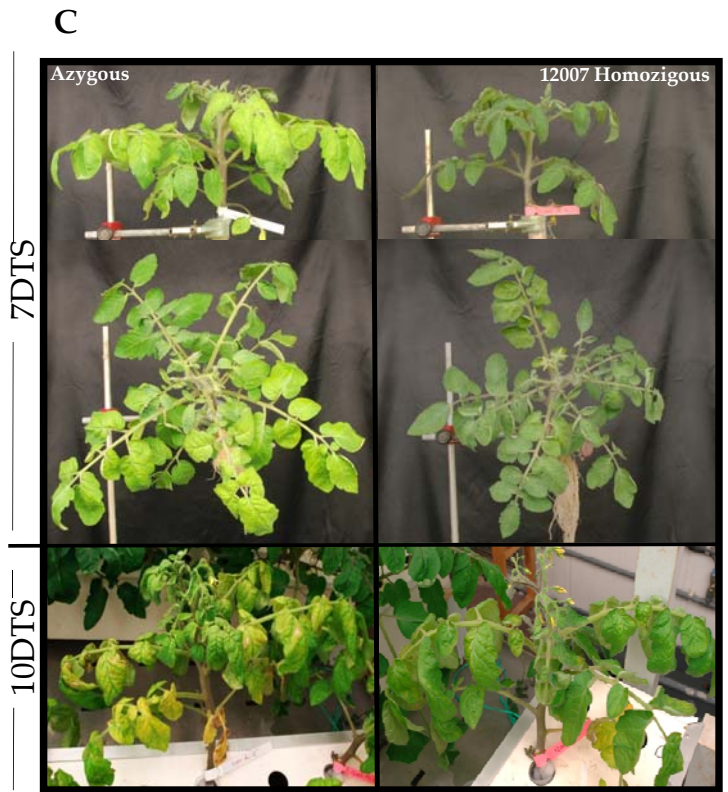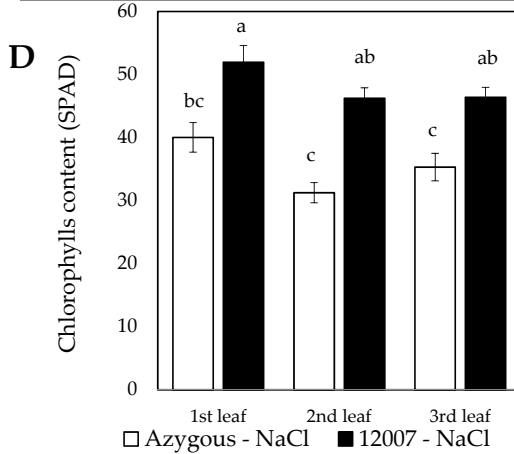

**E**

|                                           | Azygous line | 12007 line    |
|-------------------------------------------|--------------|---------------|
| Root weight (g)                           | 20.54 ± 1.94 | 16.13 ± 1.96  |
| Shoot weight (g)                          | 79.60 ± 4.93 | 54.11 ± 1.54* |
| Root water content (g g <sup>-1</sup> DW) | 17.78 ± 1.78 | 16.50 ± 2.66  |
| Leaf water content (g g <sup>-1</sup> DW) | 14.56 ± 0.90 | 11.13 ± 0.33* |

**Supplementary Figure S2.** EMS 12007 line homozygous for the single SNP in *SIWAK1* yielding a truncated protein exhibited lower leaf chlorosis, higher leaf chlorophylls content and lower shoot weight and leaf water content in salt stress condition (200 mM NaCl) compared with 12007 azygous line. Amino acid sequence predicted from the *SIWAK1* gene coding sequence in EMS 12007 line with a premature stop codon in position 414, boxed amino acid in figure 1C (the same color patterns are used for predicted conserved protein domains) (A). Output data from HRM analysis (Shifted Melting Curves and Difference Curves) for EMS 12007 line (red color line) (B). Phenotypes of azygous 12007 and homozygous 12007 lines after 7 and 10 days of salt treatment (DST) (200 mM NaCl) (C). Chlorophylls content in 1<sup>st</sup>, 2<sup>nd</sup> and 3<sup>rd</sup> leaf after 10 DST (D). Root and shoot weight, and root and leaf water contents after 10 DST (E). Data in D and E are expressed as mean ± SE (n=5). Asterisks and different letters indicate significant differences according to Student's *t* and Tukey's tests, respectively ( $p < 0.05$ ).

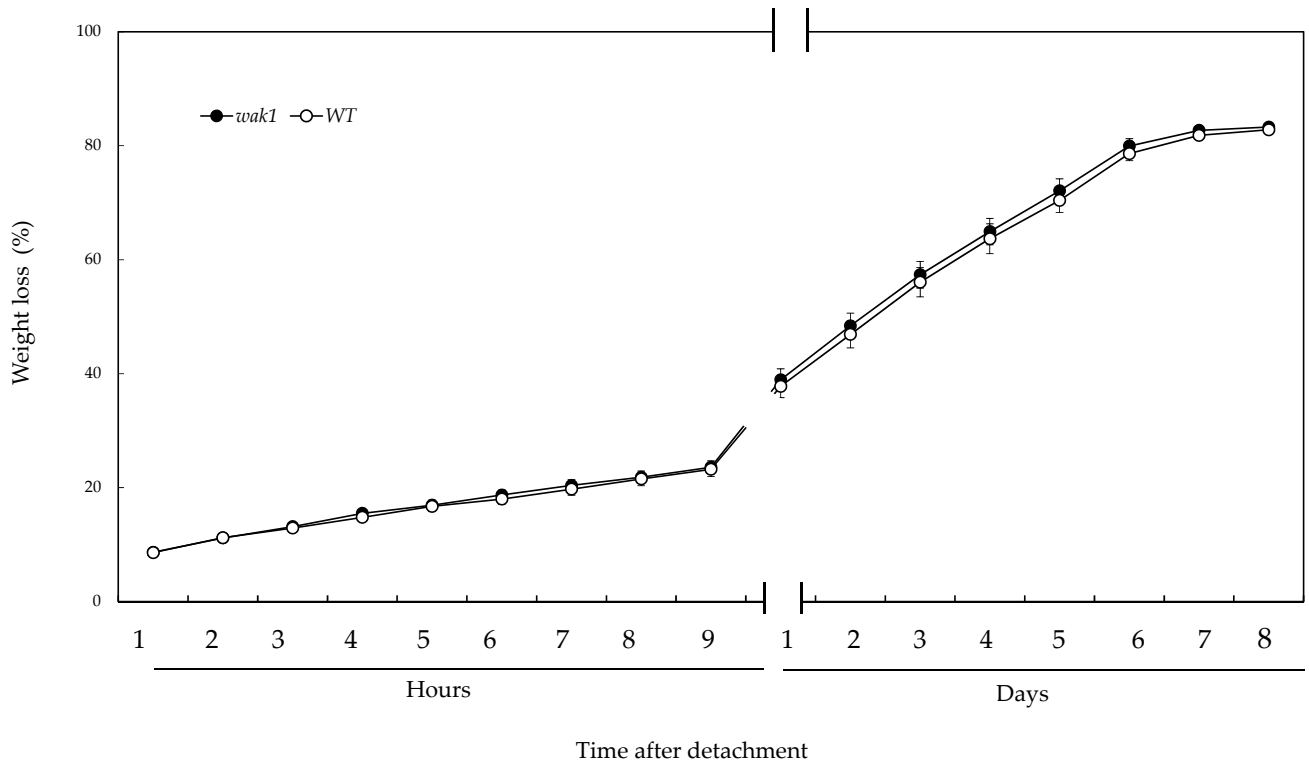

**Supplementary Figure S3.** Water loss rate measured in detached leaflets coming from the 4<sup>th</sup> leaf of *Slwak1* and WT plants grown in control. Measures were taken during the first 9 h and afterwards each 24 h (from 1 to 8 days).

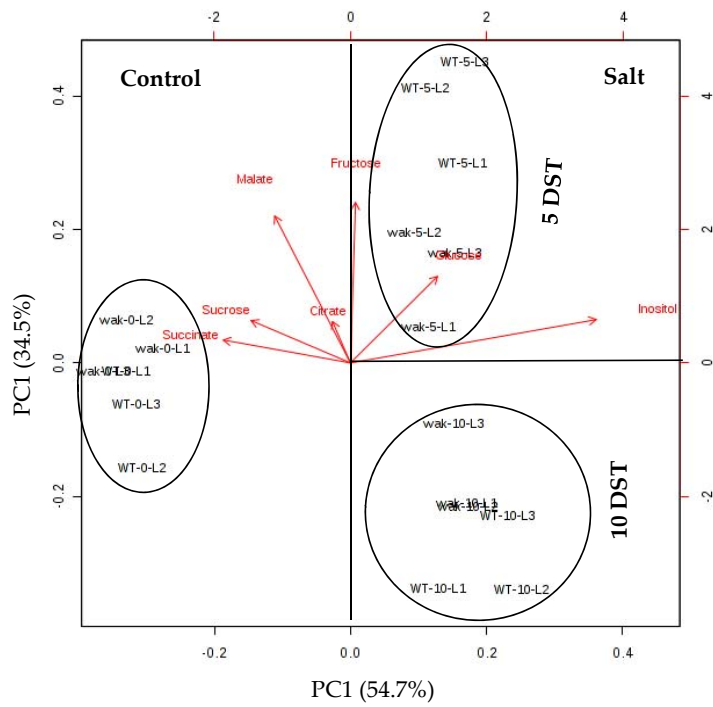

**Supplementary Figure S4.** PCA-biplot in source leaves of WT and *Slwak1* plants grown at 0, 5 and 10 days of salt treatment (200 mM NaCl).

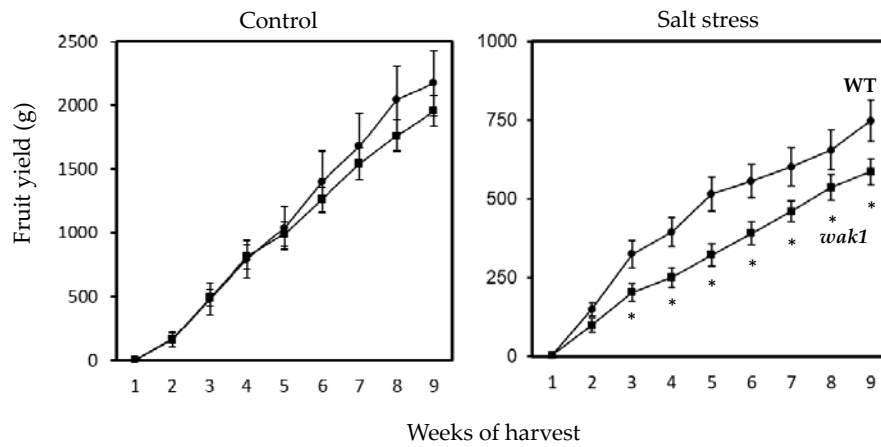

**Supplementary Figure S5.** *Slwak1* mutant reduces its fruit yield under salt stress. WT and *Slwak1* plants were grown without salt (control) and with salt stress (100 mM NaCl), and red fruits were collected for 9 weeks. Data are expressed as mean  $\pm$  SE (n=8). Asterisks indicate significant differences between mean values of WT and *Slwak1* at the same harvest week (Student's *t*-test,  $p < 0.05$ ).

**Supplementary Table S1.** Expression of *SISOS1* and *SIHKT1.2* in roots of WT and *Slwak1* plants grown without salt (control) and with salt (5 days at 200 mM NaCl). Values are the mean  $\pm$  SE of two independent assays, each with three biological replicates.

|             | <i>SISOS1</i>   |                 | <i>HKT1.2</i>   |                 |
|-------------|-----------------|-----------------|-----------------|-----------------|
|             | Control         | Salt            | Control         | Salt            |
| WT          | 1.00            | 1.40 $\pm$ 0.23 | 1.00            | 1.64 $\pm$ 0.28 |
| <i>wak1</i> | 1.18 $\pm$ 0.13 | 1.55 $\pm$ 0.13 | 1.23 $\pm$ 0.12 | 1.56 $\pm$ 0.11 |

**Supplementary Table S2: Primers used (\* in this study)**

List of primers used in qPCR:

| Gene                                  | Locus          | Sense (5'-3')           | Antisense(5'-3')       | Ref  |
|---------------------------------------|----------------|-------------------------|------------------------|------|
| <b>Wall Associated Kinase genes</b>   |                |                         |                        |      |
| SIWAK1                                | Solyc09g014720 | GGTTGTGATGACGGTGCTAT    | CAGCAACCAAAAACCCATACA  | *    |
| SIWAK2                                | Solyc09g014710 | TTTCAACACAACGATGCAAA    | TCAAATCGACTACCTTCACCA  | *    |
| SIWAK3                                | Solyc09g014730 | TGTGGGAACATCACAATTCC    | TGTTGGAGTCCCTGTTCGATT  | *    |
| <b>Sodium transporter genes</b>       |                |                         |                        |      |
| SISOS1                                | Solyc01g005020 | TCGAGTGATGATTCTGGTGG    | GACGCCTTCCACACTCTGAT   | [13] |
| SIHKT1.2                              | Solyc07g014680 | TGAGCTAGGGAATGTAATAAACG | AGAGAGAAACTAACGATGAACC | [13] |
| <b>Sucrose metabolism genes</b>       |                |                         |                        |      |
| SIIV1                                 | Solyc03g083910 | AAACTCCGCCTCTCGTTACA    | CAAAAGGAAAACGGAGAGGA   | *    |
| SILIN6                                | Solyc10g083290 | TTCTTCTTCTGGGCTTTC      | TGGACCTTGCTAGCATCAAC   | *    |
| SIINH                                 | Solyc12g099200 | GTATGCCAGAAGCATTAGAAGCA | GCATCACCAGAAGAACCAACC  | [11] |
| <b>Reference (house-keeping) gene</b> |                |                         |                        |      |
| LeEF1 $\alpha$                        | Solyc06g005060 | GACAGGCGTTCAGGTAAGGA    | GGGTATTCAGCAAAGGTCTC   | [13] |

List of primers used in PCR amplification, genotyping and Anchor-PCR:

| Gene                                               | Sense (5'-3')            | Antisense (5'-3')        | Ref  |
|----------------------------------------------------|--------------------------|--------------------------|------|
| <b>Presence of T-DNA</b>                           |                          |                          |      |
| <i>NptII</i>                                       | ATCCATCATGGCTGATGCAATGCG | CCATGATATTCGGCAAGCAGGCAT | [26] |
| <b>Genotyping analysis (primer sequence 5'-3')</b> |                          |                          |      |
| WAK1-F                                             | WAK1-R                   | ARB-2                    | *    |
| TCCCACCACTCCTATCTTCG                               | GTAGGCATGGCCAACCAATA     | GGTCTTGCGAAGGATAGTGG     |      |
| <b>Anchor-PCR analysis (primer sequence 5'-3')</b> |                          |                          |      |
| <i>Ad1</i>                                         | <i>Ad2</i>               | <i>Ad3</i>               | *    |
| CTAATACGACTCACTATAGGC                              | CTATAGGGCTCGAGCGGC       | AGCGGCGGGGAGGT           |      |
| <i>ARB-1</i>                                       | <i>ARB-2</i>             | <i>ARB-3</i>             | *    |
| ACAGTTTTCGCGATCCAGAC                               | GGTCTTGCGAAGGATAGTGG     | CTGGCGTAATAGCGAAGAGG     |      |
| <i>ALB-1</i>                                       | <i>ALB-2</i>             | <i>ALB-3</i>             | *    |
| TTGGCGTGTGAGCGTATCTA                               | ATCGGTCTCAATGCAAAAGG     | ATAATAACGCTGCGGACATCTAC  |      |

List of primers used in PCR (TILLING Strategy):

| <b>Targeting Induced Local Lesions IN Genomes analysis (primer sequence 5'-3')</b> |                        |                           |     |
|------------------------------------------------------------------------------------|------------------------|---------------------------|-----|
| Amplicon 1                                                                         | Amplicon 2             | Amplicon 3                | Ref |
| Solyc09g014720_F1                                                                  | Solyc09g014720_F2      | Solyc09g014720_F3         | *   |
| AAACACAGGTATGGGAGTTGG                                                              | ATGGACGAGGAACAGGTGA    | GCTACAATGGTTCAAGGGACA     |     |
| Solyc09g014720_R1                                                                  | Solyc09g014720_R2      | Solyc09g014720_R3         |     |
| TCAACCTGTTCTCGTCCAT                                                                | TGACTTGTCCGAAAGTATTCAG | TGATAATTCATCTTCGTTCTCTTCA |     |
